# Supplementary material for: Enhanced photoelectrochemical cytosensing of fibroblast-like synoviocyte cells based on visible light-activated ox-GQDs and carboxylated g-C3N4 sensitized TiO2 nanorods
Source: Royal Society of Chemistry journal article supplement (doi:10.1039/c6tb00295a), 2016-01-01
Supplement: c6tb00295a1.pdf [file c6tb00295a1.pdf]

**Enhanced photoelectrochemical cytosensing of fibroblast-like synoviocyte cell based on visible light-activated ox-GQDs and carboxylated g-C<sub>3</sub>N<sub>4</sub> sensitized TiO<sub>2</sub> nanorods**

Xuehui Pang<sup>1</sup>, Yong Zhang<sup>1</sup>, Cheng Liu<sup>1</sup>, Ya Huang<sup>1</sup>, Yaoguang Wang<sup>1</sup>, Jihong Pan<sup>2</sup>, Qin Wei<sup>1\*</sup>, Bin Du<sup>1</sup>

<sup>1</sup>Key Laboratory of Chemical Sensing & Analysis in Universities of Shandong, Key Laboratory of Fluorine Chemistry and Chemical Materials of Shandong Province, University of Jinan, Jinan 250022, China

<sup>2</sup>Shandong Medicinal Biotechnology Centre, the Key Lab for Biotechnology Drugs of Ministry of Health, the Key Lab of Rare and Uncommon Disease, Jinan 250022, China

\*Corresponding author. Tel.: +86 531 8276 7872. Fax: +86 531 8276 7367.

E-mail address: [sdjndxwq@163.com](mailto:sdjndxwq@163.com)

## S1. Results for the detection of FLS samples

**Table S1** Results for the detection of FLS samples

| Sample          | Addition content | Detection content       | RSD       | Recovery |
|-----------------|------------------|-------------------------|-----------|----------|
| (cell/ $\mu$ L) | (cell/ $\mu$ L)  | (cell/ $\mu$ L)         | (%, n= 5) | (%)      |
| 110             | 200              | 309, 315, 299, 302, 308 | 2.04      | 98.3     |
| 205             | 500              | 725, 695, 715, 712, 693 | 1.93      | 101      |

## S2. Nyquist plots of the modification process

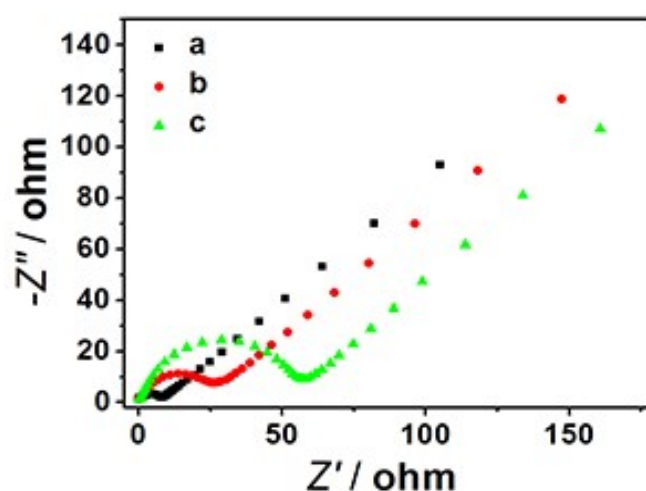

**Figure S1** Nyquist plots of the modified electrode (a) before and (b) after being modified ox-GQDs/carboxylated g- $C_3N_4$ /TiO<sub>2</sub> NRs, (c) after being modified CD95/ox-GQDs/carboxylated g- $C_3N_4$ /TiO<sub>2</sub> NRs.

All the tests were carried out in 0.1 mol/L KCl aqueous solution containing 5.0 mmol/L  $K_3Fe(CN)_6/K_4Fe(CN)_6$  (1:1). The frequency range was from 50 mHz to 100 kHz with 5 mV amplitude. Form the above figure, it can be seen that the charge transfer resistance ( $R_{et}$ ) of naked ITO was very low. After being modified the nanohybridization of TiO<sub>2</sub> NRs/carboxylated g- $C_3N_4$ /ox-GQDs,  $R_{et}$  increased nearly to 26  $\Omega$ . And after

CD95 antibody was dropped on the electrode,  $R_{et}$  increased nearly two times to  $56 \Omega$ , which suggested that the antibody was insulative.

### S3. Comparisons of this work with other works

**Table S2** Comparison of PEC in cell detection

| Ref.      | Strategy                                                                                  | Detection limit (cell/mL) | Linear range ( cell/mL )               | Detection target    |
|-----------|-------------------------------------------------------------------------------------------|---------------------------|----------------------------------------|---------------------|
| this work | Base on $TiO_2$ /carboxylated g- $C_3N_4$ /ox-GQDs                                        | 2000                      | $1.0 \times 10^4 \sim 1.0 \times 10^7$ | FLS cell            |
| 1         | Based on photoactive films by PDDA and CdSe nanoparticles capped with mercaptoacetic acid | 84                        | 160~1600                               | Ramos cell          |
| 2         | Based on CdS-polyamidoamine nano-composite film                                           | $5.0 \times 10^3$         | $5.0 \times 10^3 \sim 1.0 \times 10^7$ | SMMC-7721 cell      |
| 3         | Based on $Ag_2S$ QDs                                                                      | 98                        | 300~2000                               | MCF-7 cell          |
| 4         | Based on Mn-doped CdS QDs                                                                 | 200                       | $3.5 \times 10^2 \sim 7.0 \times 10^6$ | K562 leukemia cells |
| 5         | Based on Graphene–CdS nanocomposites                                                      | 100                       | $1.0 \times 10^2 \sim 5.0 \times 10^6$ | Hela cell           |

**Table S3** Comparison of different methods in cell detection

| Ref.      | Method                      | Detection limit (cell/mL) | Linear range ( cell/mL )               | Detection target       |
|-----------|-----------------------------|---------------------------|----------------------------------------|------------------------|
| this work | PEC                         | 2000                      | $1.0 \times 10^4 \sim 1.0 \times 10^7$ | FLS cell               |
| 6         | DPV                         | 620                       | $1.0 \times 10^3 \sim 10^7$            | BGCcell                |
| 7         | DPV                         | 500                       | $8.0 \times 10^2 \sim 2.0 \times 10^7$ | Hela cell              |
| 8         | EIS                         | 5000                      | $1.0 \times 10^4 \sim 10^7$            | HL-60 cell             |
| 9         | Quartz crystal microbalance | 750                       | $7.5 \times 10^2 \sim 7.5 \times 10^7$ | Escherichia coli.      |
| 10        | EIS and CV                  | 6000                      | $6 \times 10^4 \sim 6 \times 10^7$     | Escherichia coli.      |
| 11        | EIS                         | $10^5$                    | $10^5 \sim 10^9$                       | Salmonella typhimurium |
| 12        | EIS                         | 1000                      | $5 \times 10^3 \sim 5.0 \times 10^7$   | K562 cell              |
| 13        | EIS                         | 500                       | $5.0 \times 10^4 \sim 10^7$            | K562 cell              |
| 14        | EIS                         | 6000                      | $1.0 \times 10^4 \sim 10^7$            | CCRF-CEM cell          |

## References:

1. X. Zhang, S. Li, X. Jin and X. Li, *Biosens. Bioelectron.*, 2011, **26**, 3674-3678.
2. Z. Qian, H. Bai, G. Wang, J. Xu and H. Chen, *Biosens. Bioelectron.*, 2010, **25**, 2045-2050.
3. X. Zhang, M. Liu, H. Liu and S. Zhang, *Biosens. Bioelectron.*, 2014, **56**, 307-312.
4. P. Wu, J. Pan, X. Li, X. Hou, J. Xu and H. Chen, *Chem.-Eur. J.*, 2015, **21**, 5129-5135.
5. X. Zhao, S. Zhou, L. Jiang, W. Hou, Q. Shen and J. Zhu, *Chem.-Eur. J.*, 2012, **18**, 4974-4981
6. W. Cheng, L. Ding, J. Lei, S. Ding and H. Ju, *Anal. Chem.*, 2008, **80**, 3867-3872.
7. J. Zhang, F. Cheng, T. Zheng and J. Zhu, *Anal. Chem.*, 2010, **82**, 3547-3555.
8. J. Zhang, M. Gu, T. Zheng and J. Zhu, *Anal. Chem.*, 2009, **81**, 6641-6648.
9. Z. Shen, M. Huang, C. Xiao, Y. Zhang, X. Zeng and P. G. Wang, *Anal. Chem.*, 2007, **79**, 2312-2319.
10. C. Ruan, L. Yang and Y. Li, *Anal. Chem.*, 2002, **74**, 4814-4820.
11. O. Laczka, E. Baldrich, F. X. Muñoz and F. J. del Campo, *Anal. Chem.*, 2008, **80**, 7239-7247.
12. C. Hao, L. Ding, X. Zhang and H. Ju, *Anal. Chem.*, 2007, **79**, 4442-4447.
13. H. Hu, H. Jiang, X. Wang and B. Chen, *Electrochem. Commun.*, 2008, **10**, 1121-1124.
14. C. Pan, M. Guo, Z. Nie, X. Xiao and S. Yao, *Electroanalysis*, 2009, **21**, 1321-1326.
